# Supplementary material for: Does the Heart Fall Asleep?—Diurnal Variations in Heart Rate Variability in Patients with Disorders of Consciousness
Source: MDPI journal article supplement (doi:10.3390/brainsci12030375), 2022-03-11
Supplement: s1 [file s1]

# Does the Heart Fall Asleep?—Diurnal Variations in Heart Rate Variability in Patients with Disorders of Consciousness

SUPPLEMENTARY MATERIAL

**Monika Angerer <sup>1,2</sup>, Frank H. Wilhelm <sup>3</sup>, Michael Liedlgruber <sup>3</sup>, Gerald Pichler <sup>4</sup>, Birgit Angerer <sup>5</sup>,  
Monika Scarpatici <sup>4</sup>, Christine Blume <sup>6,7,†</sup> and Manuel Schabus <sup>1,2,\*,†</sup>**

- <sup>1</sup> Laboratory for Sleep, Cognition and Consciousness Research, Department of Psychology, University of Salzburg, 5020 Salzburg, Austria; [monika.angerer@plus.ac.at](mailto:monika.angerer@plus.ac.at)
- <sup>2</sup> Centre for Cognitive Neuroscience Salzburg (CCNS), University of Salzburg, 5020 Salzburg, Austria
- <sup>3</sup> Division of Clinical Psychology and Psychopathology, Department of Psychology, University of Salzburg, 5020 Salzburg, Austria; [frank.wilhelm@plus.ac.at](mailto:frank.wilhelm@plus.ac.at) (F.H.W.); [michael.liedlgruber@plus.ac.at](mailto:michael.liedlgruber@plus.ac.at) (M.L.)
- <sup>4</sup> Apallic Care Unit, Albert Schweitzer Hospital, Geriatric Health Care Centres of the City of Graz, 8020 Graz, Austria; [gerald.pichler@stadt.graz.at](mailto:gerald.pichler@stadt.graz.at) (G.P.); [monika.scarpatici@stadt.graz.at](mailto:monika.scarpatici@stadt.graz.at) (M.S.)
- <sup>5</sup> Private Practice for General Medicine and Neurology, 8430 Leibnitz, Austria; [leibnitz@braindoc.at](mailto:leibnitz@braindoc.at)
- <sup>6</sup> Centre for Chronobiology, Psychiatric Hospital of the University of Basel, 4002 Basel, Switzerland; [christine.blume@unibas.ch](mailto:christine.blume@unibas.ch)
- <sup>7</sup> Transfaculty Research Platform Molecular and Cognitive Neurosciences, University of Basel, 4055 Basel, Switzerland

\* Correspondence: [manuel.schabus@plus.ac.at](mailto:manuel.schabus@plus.ac.at)

† These authors contributed equally to this work.

## CRS-R Scores

**Table S1.** CRS-R scores.

| Patient ID | Auditory | Visual | Motor | Oromotor | Communic. | Arousal | Sum Score |
|------------|----------|--------|-------|----------|-----------|---------|-----------|
| P1         | 0        | 0      | 1     | 0        | 0         | 2       | 3         |
| P2         | 1        | 0      | 1     | 0        | 0         | 1       | 3         |
| P3         | 1        | 0      | 1     | 0        | 0         | 2       | 4         |
| P4         | 4        | 5      | 6     | 3        | 0         | 3       | 21        |
| P5         | 1        | 0      | 1     | 1        | 0         | 1       | 4         |
| P6         | 1        | 0      | 1     | 0        | 0         | 2       | 4         |
| P7         | 0        | 3      | 5     | 0        | 0         | 1       | 9         |
| P8         | -        | -      | -     | -        | -         | -       | -         |
| P9         | 1        | 1      | 0     | 1        | 0         | 2       | 5         |
| P10        | 1        | 0      | 1     | 1        | 0         | 1       | 4         |
| P11        | 0        | 0      | 0     | 1        | 0         | 1       | 2         |
| P12        | 0        | 0      | 1     | 1        | 0         | 2       | 4         |
| P13        | 3        | 4      | 6     | 1        | 0         | 2       | 16        |
| P14        | 1        | 0      | 2     | 1        | 0         | 2       | 6         |
| P15        | 3        | 5      | 5     | 2        | 1         | 2       | 18        |
| P16        | 4        | 2      | 1     | 1        | 0         | 2       | 10        |
| P17        | 2        | 3      | 2     | 1        | 0         | 2       | 10        |
| P18        | 0        | 3      | 0     | 1        | 0         | 2       | 6         |
| P19        | 0        | 0      | 1     | 1        | 0         | 1       | 3         |
| P20        | 2        | 3      | 2     | 2        | 0         | 2       | 11        |
| P21        | 4        | 5      | 5     | 3        | 1         | 3       | 21        |
| P22        | 0        | 1      | 2     | 1        | 0         | 2       | 6         |
| P23        | 1        | 0      | 1     | 1        | 0         | 2       | 5         |
| P24        | 1        | 1      | 2     | 2        | 0         | 2       | 8         |
| P25        | 0        | 1      | 1     | 1        | 0         | 2       | 5         |
| P26        | 2        | 3      | 2     | 2        | 1         | 3       | 13        |

Please note that we could not obtain valid CRS-R assessments in one patient (P8) because not all subscales could be evaluated (i.e., due to eyes being closed and it being impossible to induce eye-opening even when physically stimulating the patient).

## Missing Data

**Table S2.** Amount of missing data from each subject separately for time (i.e., forenoon [8 a.m.–2 p.m.], afternoon [2 p.m.–8 p.m.], night [11 p.m.–5 a.m.]).

| Patient ID | Forenoon  |            | Afternoon |            | Night     |            |
|------------|-----------|------------|-----------|------------|-----------|------------|
|            | Frequency | Percentage | Frequency | Percentage | Frequency | Percentage |
| P1         | 0         | 0          | 0         | 0          | 0         | 0          |
| P2         | 23        | 6.39       | 0         | 0          | 0         | 0          |
| P3         | 6         | 1.67       | 0         | 0          | 0         | 0          |
| P4         | 7         | 1.94       | 0         | 0          | 0         | 0          |
| P5         | 0         | 0          | 0         | 0          | 0         | 0          |
| P6         | 0         | 0          | 21        | 5.83       | 0         | 0          |
| P7         | 0         | 0          | 10        | 2.78       | 0         | 0          |

|     |   |      |   |   |    |      |
|-----|---|------|---|---|----|------|
| P8  | 0 | 0    | 0 | 0 | 26 | 7.22 |
| P9  | 0 | 0    | 0 | 0 | 0  | 0    |
| P10 | 1 | 0.28 | 0 | 0 | 0  | 0    |
| P11 | 2 | 0.56 | 0 | 0 | 0  | 0    |
| P12 | 0 | 0    | 0 | 0 | 0  | 0    |
| P13 | 0 | 0    | 0 | 0 | 0  | 0    |
| P14 | 0 | 0    | 0 | 0 | 0  | 0    |
| P15 | 0 | 0    | 0 | 0 | 0  | 0    |
| P16 | 0 | 0    | 0 | 0 | 0  | 0    |
| P17 | 0 | 0    | 0 | 0 | 0  | 0    |
| P18 | 0 | 0    | 0 | 0 | 0  | 0    |
| P19 | 0 | 0    | 0 | 0 | 0  | 0    |
| P20 | 0 | 0    | 0 | 0 | 0  | 0    |
| P21 | 0 | 0    | 0 | 0 | 0  | 0    |
| P22 | 0 | 0    | 0 | 0 | 0  | 0    |
| P23 | 0 | 0    | 0 | 0 | 0  | 0    |
| P24 | 0 | 0    | 0 | 0 | 0  | 0    |
| P25 | 0 | 0    | 0 | 0 | 0  | 0    |
| P26 | 0 | 0    | 0 | 0 | 0  | 0    |

Frequency refers to the amount of one-minute segments that are missing. Percentage describes the amount of missing one-minute segments in its relation to the total file length of six hours (i.e., 360 one-minute segments). Missing data is highlighted in grey.

### Normality Test Results

**Table S3.** Shapiro-Wilk tests (*p*-values) for normality for each variable separately for time (i.e., forenoon [8 a.m.–2 p.m.], afternoon [2 p.m.–8 p.m.], night [11 p.m.–5 a.m.]).

| Variable                      | Forenoon | Afternoon | Night   |
|-------------------------------|----------|-----------|---------|
| Interbeat interval            | 0.436    | 0.551     | 0.729   |
| Heart rate                    | 0.054    | 0.061     | 0.025   |
| RMSSD                         | 0.013    | 0.003     | 0.194   |
| Very low frequency            | 0.012    | 0.075     | 0.281   |
| Low frequency                 | 0.005    | 0.017     | 0.497   |
| High frequency                | 0.001    | 0.008     | 0.004   |
| Approximate entropy           | 0.907    | 0.162     | 0.193   |
| DfaAlpha                      | 0.067    | 0.002     | 0.352   |
| Hurst exponent                | 0.162    | 0.056     | 0.061   |
| Sample entropy 1              | 0.001    | < 0.001   | < 0.001 |
| Sample entropy 2              | 0.212    | 0.703     | 0.469   |
| Sample entropy 3              | 0.054    | 0.693     | 0.603   |
| Sample entropy 4              | 0.092    | 0.687     | 0.705   |
| Sample entropy 5              | 0.079    | 0.652     | 0.916   |
| EEG permutation entropy       |          | 0.219     | 0.681   |
| CRS-R sum score               | < 0.001  |           |         |
| CRS-R auditory subscale score | < 0.001  |           |         |
| CRS-R visual subscale score   | < 0.001  |           |         |
| CRS-R motor subscale score    | < 0.001  |           |         |
| CRS-R oromotor subscale score | < 0.001  |           |         |

|                                    |         |
|------------------------------------|---------|
| CRS-R communication subscale score | < 0.001 |
| CRS-R arousal subscale score       | < 0.001 |
| Age                                | < 0.001 |
| Time since injury                  | < 0.001 |

*P*-values for EEG permutation entropy refer to day (i.e., 8 a.m.–8 p.m.) and night (i.e., 11 p.m.–5 a.m.). *P*-values for CRS-R scores, age and time since injury refer to all time conditions (i.e., forenoon, afternoon, and night). Significant *p*-values (i.e.  $p < 0.05$ ), which indicate that the data is not normal distributed, are marked in grey. Abbreviations: RMSSD = root mean square of successive differences between adjacent heartbeats, DfaAlpha = detrended fluctuation analysis scaling exponent.

## Results

### Heart Rate

Analyses of the heart rate (HR) of 26 patients revealed a trend towards a main effect for *time* ( $F_{WTS}(2)=7.28$ ,  $p=0.053$ ) and a significant effect for *diagnosis* ( $F_{WTS}(1)=5.1$ ,  $p=0.039$ ), but no significant *time*  $\times$  *diagnosis* interaction ( $F_{WTS}(2)=1.42$ ,  $p=0.515$ ). Specifically, patients showed a lower HR during night as compared to forenoon ( $F_{WTS}(1)=8.26$ ,  $p=0.021$ ) and afternoon ( $F_{WTS}(1)=6.64$ ,  $p=0.024$ ). No differences could be observed in the patients' HR between fore- and afternoon ( $F_{WTS}(1)=0.002$ ,  $p=0.967$ ; cf. Figure S1a). Further, patients with UWS showed a lower HR as compared to patients with (E)MCS ( $F_{WTS}(1)=5.1$ ,  $p=0.039$ ; cf. Figure S1b). This effect was also visible when correlating HR and CRS-R sum scores of 25 patients, showing that lower CRS-R sum scores were associated with lower HR during forenoon ( $r\tau(23)=0.34$ ,  $p=0.02$ ; cf. Figure S2a), afternoon ( $r\tau(23)=0.38$ ,  $p=0.009$ ; cf. Figure S2b) and night ( $r\tau(23)=0.28$ ,  $p=0.056$ ;  $b=1.41$ , 95% CI = [0.10, 2.72]; cf. Figure S2c).

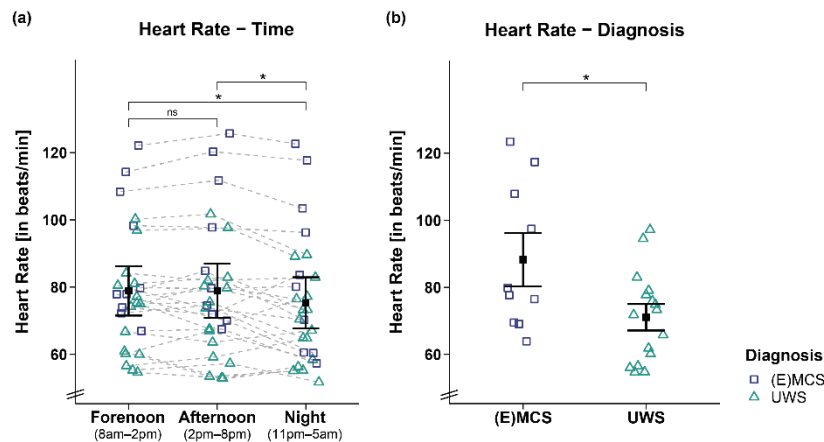

**Figure S1.** Heart rate (HR) separately for time and diagnosis contrasts. **(a)** While patients' HR was lower during the night as compared to the day (i.e., forenoon, afternoon), it did not differ between fore- and afternoon. **(b)** Patients with UWS showed a lower HR than patients with (E)MCS. Error bars represent the mean and 95% confidence interval. \* $p < 0.05$ , ns = not significant. Abbreviations: (E)MCS = (emergence from) minimally conscious state, UWS = unresponsive wakefulness syndrome, beats/min = heartbeats per minute.

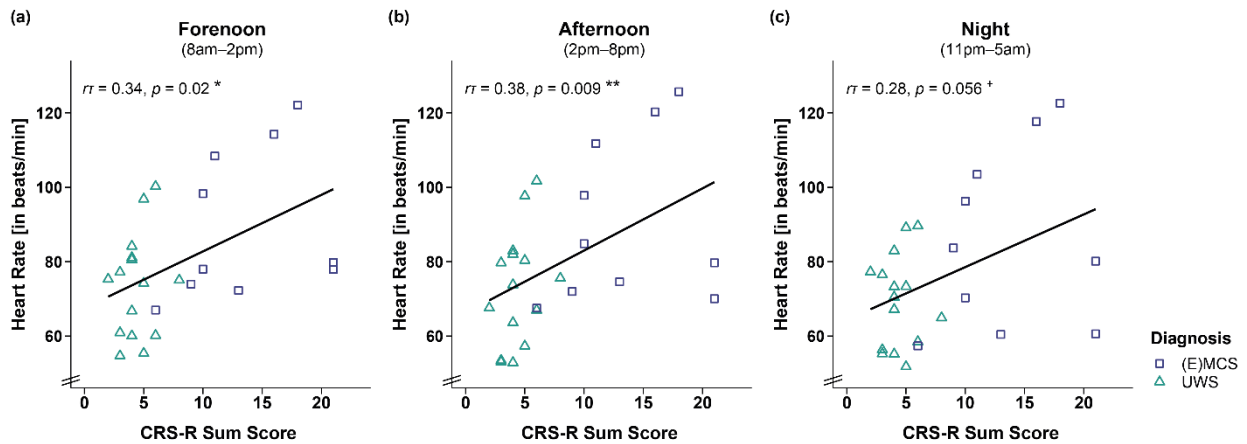

**Figure S2.** Correlation between heart rate (HR) and CRS-R sum score separately for time. A higher HR was associated with a higher CRS-R sum score throughout the (a, b) day (i.e., forenoon, afternoon) and (c) night. \*\*  $p < 0.01$ , \*  $p < 0.05$ , +  $p \leq 0.1$ . Abbreviations: (E)MCS = (emergence from) minimally conscious state, UWS = unresponsive wakefulness syndrome, beats/min = heartbeats per minute.

### Etiology

**Table S4.** Wald-type statistic (WTS) of the different HRV parameters separately for the main effects ‘time’ (i.e., forenoon [8 a.m.–2 p.m.], afternoon [2 p.m.–8 p.m.], night [11 p.m.–5 a.m.]) and ‘etiology’ (i.e., traumatic vs. non-traumatic brain injury), and the ‘time  $\times$  etiology’ interaction ( $N=26$ ).

| Variable            | Time                        | Etiology                   | Time $\times$ Etiology     |
|---------------------|-----------------------------|----------------------------|----------------------------|
| Interbeat interval  | $F_{WTS}(2)=7.37, p=0.050$  | $F_{WTS}(1)=0.08, p=0.778$ | $F_{WTS}(2)=5.58, p=0.088$ |
| Heart rate          | $F_{WTS}(2)=7.82, p=0.041$  | $F_{WTS}(1)=0.00, p=0.949$ | $F_{WTS}(2)=3.33, p=0.220$ |
| RMSSD               | $F_{WTS}(2)=0.50, p=0.789$  | $F_{WTS}(1)=0.00, p=0.961$ | $F_{WTS}(2)=1.51, p=0.502$ |
| Very low frequency  | $F_{WTS}(2)=7.47, p=0.046$  | $F_{WTS}(1)=0.22, p=0.648$ | $F_{WTS}(2)=2.19, p=0.368$ |
| Low frequency       | $F_{WTS}(2)=6.59, p=0.065$  | $F_{WTS}(1)=0.02, p=0.893$ | $F_{WTS}(2)=2.90, p=0.268$ |
| High frequency      | $F_{WTS}(2)=4.08, p=0.178$  | $F_{WTS}(1)=0.24, p=0.619$ | $F_{WTS}(2)=2.16, p=0.382$ |
| Approximate entropy | $F_{WTS}(2)=20.74, p=0.001$ | $F_{WTS}(1)=0.30, p=0.575$ | $F_{WTS}(2)=2.90, p=0.277$ |
| DfaAlpha            | $F_{WTS}(2)=0.44, p=0.816$  | $F_{WTS}(1)=4.59, p=0.043$ | $F_{WTS}(2)=1.29, p=0.552$ |
| Hurst exponent      | $F_{WTS}(2)=2.36, p=0.335$  | $F_{WTS}(1)=0.09, p=0.772$ | $F_{WTS}(2)=2.01, p=0.400$ |
| Sample entropy 1    | $F_{WTS}(2)=0.41, p=0.830$  | $F_{WTS}(1)=4.36, p=0.049$ | $F_{WTS}(2)=1.22, p=0.579$ |
| Sample entropy 2    | $F_{WTS}(2)=3.79, p=0.193$  | $F_{WTS}(1)=0.51, p=0.477$ | $F_{WTS}(2)=2.04, p=0.396$ |
| Sample entropy 3    | $F_{WTS}(2)=3.4, p=0.226$   | $F_{WTS}(1)=1.03, p=0.316$ | $F_{WTS}(2)=1.34, p=0.543$ |
| Sample entropy 4    | $F_{WTS}(2)=3.26, p=0.239$  | $F_{WTS}(1)=1.07, p=0.304$ | $F_{WTS}(2)=0.68, p=0.734$ |
| Sample entropy 5    | $F_{WTS}(2)=2.43, p=0.338$  | $F_{WTS}(1)=1.09, p=0.300$ | $F_{WTS}(2)=0.78, p=0.701$ |

Significant  $p$ -values (i.e.  $p < .05$ ) are marked in grey. Abbreviations: RMSSD = root mean square of successive differences between adjacent heartbeats, DfaAlpha = detrended fluctuation analysis scaling exponent.

### Sex

**Table S5.** Wald-type statistic (WTS) of the different HRV parameters separately for the main effects ‘time’ (i.e., forenoon [8 a.m.–2 p.m.], afternoon [2 p.m.–8 p.m.], night [11 p.m.–5 a.m.]), ‘sex’ (i.e., male vs. female), and the ‘time  $\times$  sex’ interaction ( $N=26$ ).

| Variable           | Time                       | Sex                        | Time $\times$ Sex          |
|--------------------|----------------------------|----------------------------|----------------------------|
| Interbeat interval | $F_{WTS}(2)=4.66, p=0.156$ | $F_{WTS}(1)=2.36, p=0.143$ | $F_{WTS}(2)=3.89, p=0.205$ |
| Heart rate         | $F_{WTS}(2)=6.06, p=0.099$ | $F_{WTS}(1)=1.96, p=0.176$ | $F_{WTS}(2)=3.82, p=0.217$ |
| RMSSD              | $F_{WTS}(2)=0.18, p=0.920$ | $F_{WTS}(1)=0.44, p=0.514$ | $F_{WTS}(2)=1.41, p=0.547$ |

|                     |                             |                            |                            |
|---------------------|-----------------------------|----------------------------|----------------------------|
| Very low frequency  | $F_{WTS}(2)=12.21, p=0.014$ | $F_{WTS}(1)=0.09, p=0.773$ | $F_{WTS}(2)=0.11, p=0.950$ |
| Low frequency       | $F_{WTS}(2)=12.08, p=0.015$ | $F_{WTS}(1)=0.53, p=0.478$ | $F_{WTS}(2)=0.05, p=0.977$ |
| High frequency      | $F_{WTS}(2)=1.1, p=0.622$   | $F_{WTS}(1)=1.45, p=0.242$ | $F_{WTS}(2)=1.82, p=0.310$ |
| Approximate entropy | $F_{WTS}(2)=22.29, p=0.002$ | $F_{WTS}(1)=0.26, p=0.607$ | $F_{WTS}(2)=2.27, p=0.383$ |
| DfaAlpha            | $F_{WTS}(2)=0.05, p=0.975$  | $F_{WTS}(1)=3.92, p=0.062$ | $F_{WTS}(2)=4.89, p=0.135$ |
| Hurst exponent      | $F_{WTS}(2)=1.59, p=0.495$  | $F_{WTS}(1)=0.45, p=0.507$ | $F_{WTS}(2)=8.47, p=0.044$ |
| Sample entropy 1    | $F_{WTS}(2)=0.3, p=0.883$   | $F_{WTS}(1)=1.45, p=0.253$ | $F_{WTS}(2)=2.78, p=0.325$ |
| Sample entropy 2    | $F_{WTS}(2)=4.51, p=0.159$  | $F_{WTS}(1)=0.00, p=0.985$ | $F_{WTS}(2)=2.17, p=0.394$ |
| Sample entropy 3    | $F_{WTS}(2)=3.57, p=0.229$  | $F_{WTS}(1)=0.04, p=0.858$ | $F_{WTS}(2)=1.89, p=0.443$ |
| Sample entropy 4    | $F_{WTS}(2)=3.19, p=0.268$  | $F_{WTS}(1)=0.05, p=0.824$ | $F_{WTS}(2)=1.41, p=0.537$ |
| Sample entropy 5    | $F_{WTS}(2)=2.01, p=0.428$  | $F_{WTS}(1)=0.08, p=0.792$ | $F_{WTS}(2)=1.39, p=0.541$ |

Abbreviations: RMSSD = root mean square of successive differences between adjacent heartbeats, DfaAlpha = detrended fluctuation analysis scaling exponent.

### Entropy Parameters

**Table S6.** Wald-type statistic (WTS) of the different entropy parameters separately for the main effects ‘time’ (i.e., forenoon [8 a.m.–2 p.m.], afternoon [2 p.m.–8 p.m.], night [11 p.m.–5 a.m.]) and ‘diagnosis’ (i.e., E/MCS vs. UWS), and the ‘time × diagnosis’ interaction ( $N=26$ ).

| Variable         | Time                       | Diagnosis                  | Time × Diagnosis           |
|------------------|----------------------------|----------------------------|----------------------------|
| DfaAlpha         | $F_{WTS}(2)=0.48, p=0.807$ | $F_{WTS}(1)=1.53, p=0.228$ | $F_{WTS}(2)=0.71, p=0.721$ |
| Hurst exponent   | $F_{WTS}(2)=3.05, p=0.257$ | $F_{WTS}(1)=0.22, p=0.646$ | $F_{WTS}(2)=1.08, p=0.604$ |
| Sample entropy 1 | $F_{WTS}(2)=0.40, p=0.841$ | $F_{WTS}(1)=0.44, p=0.518$ | $F_{WTS}(2)=0.24, p=0.901$ |
| Sample entropy 2 | $F_{WTS}(2)=4.27, p=0.161$ | $F_{WTS}(1)=0.07, p=0.791$ | $F_{WTS}(2)=0.05, p=0.980$ |
| Sample entropy 3 | $F_{WTS}(2)=3.97, p=0.178$ | $F_{WTS}(1)=0.01, p=0.941$ | $F_{WTS}(2)=0.06, p=0.972$ |
| Sample entropy 4 | $F_{WTS}(2)=3.71, p=0.197$ | $F_{WTS}(1)=0.12, p=0.737$ | $F_{WTS}(2)=0.09, p=0.958$ |
| Sample entropy 5 | $F_{WTS}(2)=2.93, p=0.271$ | $F_{WTS}(1)=0.21, p=0.650$ | $F_{WTS}(2)=0.01, p=0.996$ |

Abbreviation: DfaAlpha = detrended fluctuation analysis scaling exponent.

### EEG Entropy

Analyses of the EEG permutation entropy (PE) of 14 patients revealed a significant main effect for *time* ( $F_{WTS}(2)=9.79, p=0.011$ ) with patients showing higher PE during the day (i.e., 8 a.m.–8 p.m.) as compared to the night (i.e., 11 p.m.–5 a.m.), and a significant *time × diagnosis* interaction ( $F_{WTS}(2)=5.39, p=0.041$ ), but no significant main effect for *diagnosis* ( $F_{WTS}(1)=0.12, p=0.733$ ). Specifically, while patients with (E)MCS showed a lower PE during the night than during the day ( $F_{WTS}(1)=21.87, p=0.002$ ), no such day-night difference was observed in patients with UWS ( $F_{WTS}(1)=0.25, p=0.631$ ). This has already been shown in Ref. [25]. We ran the analyses again as we only use a subsample of the dataset here.
